# Supplementary material for: Bucket Fuser: Statistical Signal Extraction for 1D 1H NMR Metabolomic Data
Source: MDPI journal article supplement (doi:10.3390/metabo12090812), 2022-08-29

# Supplementary Information for “Bucket Fuser: statistical signal extraction for 1D $^1\text{H}$ NMR metabolomics data”

## 1 Current GCKD Investigators and Collaborators with the GCKD Study

University of Erlangen: Kai-Uwe Eckardt, Heike Meiselbach, Markus P. Schneider, Mario Schiffer, Hans-Ulrich Prokosch, Barbara Bärthlein, Andreas Beck, André Reis, Arif B. Ekici, Susanne Becker, Dinah Becker-Grosspitsch, Ulrike Alberth-Schmidt, Birgit Hausknecht, Anke Weigel;

University of Freiburg: Gerd Walz, Anna Köttgen, Ulla T. Schultheiß, Fruzsina Kotsis, Simone Meder, Erna Mitsch, Ursula Reinhard;

RWTH Aachen University: Jürgen Floege, Turgay Saritas;

Charité, University Medicine Berlin: Elke Schaeffner, Seema Baid-Agrawal, Kerstin Theisen;

Hannover Medical School: Hermann Haller, Jan Menne;

University of Heidelberg: Martin Zeier, Claudia Sommerer, Johanna Theilinger;

University of Jena: Gunter Wolf, Martin Busch, Rainer Paul;

Ludwig-Maximilians University of München: Thomas Sitter;

University of Würzburg: Christoph Wanner, Vera Krane, Antje Börner-Klein, Britta Bauer;

Medical University of Innsbruck, Division of Genetic Epidemiology: Florian Kronenberg, Julia Raschenberger, Barbara Kollerits, Lukas Forer, Sebastian Schönherr, Hansi Weissensteiner;

University of Regensburg, Institute of Functional Genomics: Peter Oefner, Wolfram Gronwald;

Institute of Medical Biometry, Informatics and Epidemiology, Medical Faculty, University of Bonn: Matthias Schmid, Jennifer Nadal.

## 2 The Python implementation of the Bucket Fuser algorithm

The Python implementation of the Bucket Fuser algorithm and a comprehensive tutorial are available in supplementary file S1.

## 3 Supplementary Tables

Table S1: Spearman’s correlations to absolutely quantified metabolite concentrations for BF with  $\lambda = 1$ , BF with  $\lambda = 2.5$ , BF with  $\lambda = 5$ , JBA, SRV, and equidistant binnings with bin sizes 0.01 ppm and 0.02 ppm. Here, 3-HB = 3-hydroxybutyrate. Further provided are the spectral positions of the bins with largest absolute Spearman’s correlation coefficients and the corresponding metabolite identities.

|                        | BF ( $\lambda = 1$ ) |                       |                                                        | BF ( $\lambda = 2.5$ ) |                       |                                                        | BF ( $\lambda = 5$ ) |                       |                                                        |
|------------------------|----------------------|-----------------------|--------------------------------------------------------|------------------------|-----------------------|--------------------------------------------------------|----------------------|-----------------------|--------------------------------------------------------|
|                        | correlation          | spectral position     | metabolite                                             | correlation            | spectral position     | metabolite                                             | correlation          | spectral position     | metabolite                                             |
| 3-HB                   | 0.708                | ppm.2.3974-ppm.2.3954 | 3-HB,                                                  | 0.720                  | ppm.1.8094-ppm.1.8064 | 3-HB,                                                  | 0.689                | ppm.4.1564-ppm.4.1544 | 3-HB,                                                  |
| Acetate                | 0.757                | ppm.1.9244-ppm.1.9194 | acetylne, glutamate                                    | 0.983                  | ppm.1.9274-ppm.1.9244 | lactate, proline                                       | 0.989                | ppm.1.9274-ppm.1.9224 | acetate, proline                                       |
| Acetoacetate           | 0.670                | ppm.2.3814-ppm.2.3794 | 3-hydroxyisovalerate, pyruvate, succinate              | 0.664                  | ppm.2.3794-ppm.2.3774 | 3-hydroxyisovalerate, pyruvate, succinate              | 0.610                | ppm.2.3794-ppm.2.3744 | 3-hydroxyisovalerate, pyruvate, succinate              |
| Acetone                | 0.728                | ppm.2.3314-ppm.2.3294 | 2-hydroxyglutarate, glutamate, proline                 | 0.748                  | ppm.2.2354-ppm.2.2334 | acetone, macromolecules                                | 0.568                | ppm.2.2374-ppm.2.2314 | acetone, macromolecules                                |
| Alanine                | 0.689                | ppm.1.4874-ppm.1.4844 | alanine                                                | 0.927                  | ppm.1.4934-ppm.1.4914 | alanine                                                | 0.917                | ppm.1.4814-ppm.1.4784 | alanine                                                |
| Asparagine             | 0.685                | ppm.2.1444-ppm.2.1424 | glutamine, glutamine                                   | 0.662                  | ppm.1.1444-ppm.1.1394 | glutamine, glutamine                                   | 0.635                | ppm.2.1514-ppm.2.1484 | glutamine, glutamine                                   |
| Betaine                | 0.500                | ppm.3.3814-ppm.3.3694 | glucose, betaine, myo-inositol, trimethylamine-N-oxide | 0.637                  | ppm.3.2784-ppm.3.2704 | glucose, betaine, myo-inositol, trimethylamine-N-oxide | 0.480                | ppm.3.2784-ppm.3.2724 | glucose, betaine, myo-inositol, trimethylamine-N-oxide |
| Carnitine              | 0.678                | ppm.2.4484-ppm.2.4464 | glutamine, carnitine                                   | 0.419                  | ppm.2.3114-ppm.3.1994 | macromolecule (?)                                      | 0.427                | ppm.3.0504-ppm.3.0434 | creatine, creatine                                     |
| Creatine               | 0.929                | ppm.3.0394-ppm.3.0374 | creatine                                               | 0.907                  | ppm.3.0404-ppm.3.0374 | creatine                                               | 0.884                | ppm.3.0504-ppm.3.0434 | creatine, creatine                                     |
| Creatinine             | 0.772                | ppm.3.0394-ppm.3.0374 | creatine                                               | 0.863                  | ppm.3.0624-ppm.3.0594 | creatine                                               | 0.881                | ppm.3.0634-ppm.3.0604 | creatine                                               |
| Diamine                | 0.900                | ppm.3.4624-ppm.3.4584 | phenylalanine                                          | 0.900                  | ppm.3.4724-ppm.3.4674 | phenylalanine                                          | 0.889                | ppm.3.4884-ppm.3.4834 | phenylalanine                                          |
| Glucose                | 0.873                | ppm.2.4674-ppm.2.4654 | glutamine, 3-hydroxyisobutyrate, carnitine             | 0.870                  | ppm.2.4554-ppm.2.4524 | glutamine, 3-hydroxyisobutyrate, carnitine             | 0.890                | ppm.2.4684-ppm.2.4614 | glucose                                                |
| Glycine                | 0.838                | ppm.3.5714-ppm.3.5654 | glycine, 3-hydroxyisobutyrate                          | 0.808                  | ppm.3.5694-ppm.3.5674 | glycine, 3-hydroxyisobutyrate                          | 0.741                | ppm.3.5704-ppm.3.5604 | carnitine                                              |
| Histidine              | 0.438                | ppm.2.1444-ppm.2.1424 | glutamine, glutamine                                   | 0.764                  | ppm.2.1694-ppm.2.1604 | histidine                                              | 0.523                | ppm.2.1514-ppm.2.1484 | glutamine, glutamine                                   |
| Isoleucine             | 0.866                | ppm.1.1014-ppm.1.1004 | 3-hydroxyisobutyrate                                   | 0.911                  | ppm.1.0224-ppm.1.0204 | isoleucine, 3-hydroxyisobutyrate                       | 0.898                | ppm.1.0554-ppm.1.0524 | 3-hydroxyisobutyrate                                   |
| Lactate                | 0.988                | ppm.4.1294-ppm.4.1274 | lactate                                                | 0.980                  | ppm.4.1184-ppm.4.1164 | lactate                                                | 0.889                | ppm.4.1294-ppm.4.1154 | lactate                                                |
| Phenylalanine          | 0.850                | ppm.7.3424-ppm.7.3394 | phenylalanine                                          | 0.874                  | ppm.7.3114-ppm.7.3074 | phenylalanine                                          | 0.888                | ppm.7.4344-ppm.7.4294 | phenylalanine                                          |
| Proline                | 0.754                | ppm.2.3434-ppm.2.3384 | proline, glutamate                                     | 0.937                  | ppm.4.1524-ppm.4.1504 | proline                                                | 0.609                | ppm.3.3504-ppm.3.3344 | proline, glutamate                                     |
| Pyruvate               | 0.884                | ppm.2.3814-ppm.2.3794 | pyruvate, 3-hydroxyisovalerate, succinate              | 0.968                  | ppm.2.3794-ppm.2.3774 | pyruvate, 3-hydroxyisovalerate, succinate              | 0.941                | ppm.2.3794-ppm.2.3744 | pyruvate, proline, glutamate                           |
| Trimethylamine N-Oxide | 0.822                | ppm.3.4814-ppm.3.4764 | glutamine, trimethylamine-N-oxide                      | 0.902                  | ppm.3.4764-ppm.3.4714 | tyrosine, trimethylamine-N-oxide                       | 0.941                | ppm.3.4764-ppm.3.4714 | tyrosine, trimethylamine-N-oxide                       |
| Tyrosine               | 0.931                | ppm.6.9004-ppm.6.8854 | tyrosine                                               | 0.941                  | ppm.7.1924-ppm.7.1894 | tyrosine                                               | 0.941                | ppm.6.9114-ppm.6.8944 | tyrosine                                               |
| Valine                 | 0.811                | ppm.0.9674-ppm.0.9654 | leucine, macromolecule                                 | 0.947                  | ppm.1.0544-ppm.1.0524 | valine                                                 | 0.961                | ppm.1.0434-ppm.1.0404 | valine                                                 |
|                        |                      |                       |                                                        |                        |                       |                                                        |                      |                       |                                                        |
|                        | JBA                  |                       |                                                        | SRV                    |                       |                                                        | EB (0.01 ppm)        |                       |                                                        |
|                        | correlation          | spectral position     | metabolite                                             | correlation            | spectral position     | metabolite                                             | correlation          | spectral position     | metabolite                                             |
| 3-HB                   | 0.708                | 2.3964                | 3-HB                                                   | 0.600                  | ppm.2.3694-2.3624     | 3-HB                                                   | 0.447                | ppm.2.285             | 3-HB                                                   |
| Acetate                | 0.960                | 1.9254                | carnitine, glutamate                                   | 0.908                  | ppm.1.9344-1.9184     | carnitine, glutamate                                   | 0.946                | ppm.1.925             | acetate                                                |
| Acetoacetate           | 0.670                | 2.3804                | 3-hydroxyisovalerate, pyruvate, succinate              | 0.611                  | ppm.4.2844-4.2754     | noise                                                  | 0.614                | ppm.4.285             | noise                                                  |
| Acetone                | 0.530                | 2.4324                | glutamine                                              | 0.472                  | ppm.2.4344-2.4294     | glutamine, 3-HB, 3-hydroxyisobutyrate, carnitine       | 0.455                | ppm.2.235             | acetone, macromolecules                                |
| Alanine                | 0.722                | 1.4859                | 3-hydroxyisobutyrate, carnitine                        | 0.915                  | ppm.1.5054-1.4794     | alanine                                                | 0.926                | ppm.1.495             | alanine                                                |
| Asparagine             | 0.563                | 2.4559                | glutamine, glutamine                                   | 0.698                  | ppm.2.4474-2.4414     | glutamate, glutamine                                   | 0.683                | ppm.2.145             | glutamine, glutamine                                   |
| Betaine                | 0.689                | 3.2724                | 3-hydroxyisobutyrate, carnitine                        | 0.481                  | ppm.3.9104-3.9064     | glucose, betaine                                       | 0.630                | ppm.3.275             | glucose, betaine, myo-inositol, trimethylamine-N-oxide |
| Carnitine              | 0.692                | 2.4464                | glutamine, carnitine                                   | 0.412                  | ppm.1.8284-1.8164     | noise                                                  | 0.444                | ppm.3.045             | creatine, creatine                                     |
| Creatine               | 0.930                | 3.0379                | creatine                                               | 0.812                  | ppm.3.0434-3.0384     | creatine                                               | 0.783                | ppm.3.065             | creatine, creatine                                     |
| Creatinine             | 0.743                | 3.0379                | creatine                                               | 0.782                  | ppm.3.0624-3.0574     | creatine                                               | 0.783                | ppm.3.065             | creatine, creatine                                     |
| Diamine                | 0.908                | 3.4579                | phenylalanine                                          | 0.882                  | ppm.3.4724-3.4674     | phenylalanine                                          | 0.887                | ppm.3.475             | phenylalanine                                          |
| Dihydroxyacetone       | 0.508                | 1.7729                | noise, macromolecules                                  | 0.684                  | ppm.2.7324-2.7244     | dihydroxyacetone                                       | 0.587                | ppm.1.765             | noise, macromolecules                                  |
| Glucose                | 0.987                | 3.4599                | glucose                                                | 0.989                  | ppm.3.4924-3.4774     | glucose                                                | 0.900                | ppm.3.475             | glucose                                                |
| Glutamine              | 0.612                | 2.4559                | glutamine, 3-hydroxyisobutyrate, carnitine             | 0.779                  | ppm.2.4474-2.4414     | glutamate, glutamine                                   | 0.897                | ppm.2.455             | glutamine, 3-hydroxyisobutyrate, carnitine             |
| Glycine                | 0.322                | 3.6579                | creatine, creatinine                                   | 0.778                  | ppm.3.3724-3.3634     | glycine, 3-hydroxyisobutyrate                          | 0.655                | ppm.3.365             | glycine, 3-hydroxyisobutyrate                          |
| Histidine              | 0.445                | 1.7244                | glutamine, glutamine                                   | 0.687                  | ppm.1.0734-1.0664     | histidine                                              | 0.618                | ppm.1.085             | isobutyrate, 3-hydroxyisobutyrate                      |
| Isoleucine             | 0.735                | 0.9724                | macromolecules, unknown (?)                            | 0.702                  | ppm.1.0594-1.0314     | valine                                                 | 0.792                | ppm.1.015             | valine                                                 |
| Lactate                | 0.979                | 4.1204                | lactate                                                | 0.983                  | ppm.4.1434-4.1404     | lactate                                                | 0.900                | ppm.4.115             | lactate                                                |
| Phenylalanine          | 0.819                | 7.3424                | phenylalanine                                          | 0.818                  | ppm.7.4594-7.4424     | phenylalanine                                          | 0.810                | ppm.7.385             | phenylalanine                                          |
| Proline                | 0.676                | 3.3434                | proline, unknown (?)                                   | 0.871                  | ppm.2.1534-2.1484     | proline                                                | 0.880                | ppm.3.345             | proline, xylitol                                       |
| Pyruvate               | 0.908                | 2.3794                | pyruvate, 3-hydroxyisovalerate, succinate              | 0.908                  | ppm.2.3794-2.3774     | pyruvate, 3-hydroxyisovalerate, succinate              | 0.908                | ppm.2.345             | pyruvate, 3-hydroxyisovalerate, succinate              |
| Threonine              | 0.426                | 2.2014                | tyrosine                                               | 0.472                  | ppm.6.9174-6.8884     | tyrosine                                               | 0.474                | ppm.6.880             | tyrosine                                               |
| Trimethylamine N-Oxide | 0.849                | 3.2724                | trimethylamine-N-oxide                                 | 0.279                  | ppm.2.3.614-3.1554    | dimethyl sulfone (?), Cs-EDTA2+                        | 0.400                | ppm.3.275             | trimethylamine-N-oxide                                 |
| Tyrosine               | 0.816                | 7.1944                | tyrosine                                               | 0.935                  | ppm.6.9174-6.8864     | tyrosine                                               | 0.939                | ppm.6.895             | tyrosine                                               |
| Valine                 | 0.725                | 0.9724                | leucine, macromolecule                                 | 0.924                  | ppm.1.0594-1.0314     | valine                                                 | 0.952                | ppm.1.055             | valine                                                 |

Table S2: Number of metabolite features extracted from 1D  $^1\text{H}$  NMR spectra of (a) urinary and (b) plasma AKI data sets for different binning approaches. <sup>a</sup>Number of bins after exclusion of 21 bins corresponding to filter residues and free EDTA. <sup>b</sup>Number of bins after exclusion of 16 bins corresponding to filter residues and free EDTA. <sup>c</sup>Number of bins after exclusion of 29 bins corresponding to filter residues and free EDTA. <sup>d</sup>Number of bins after exclusion of 12 bins corresponding to filter residues and free EDTA. <sup>e</sup>Number of bins after exclusion of 28 bins corresponding to filter residues and free EDTA. <sup>f</sup>Number of bins after exclusion of 12 bins corresponding to filter residues and free EDTA. <sup>g</sup>Number of bins after exclusion of 20 bins corresponding to filter residues and free EDTA. <sup>h</sup>Number of bins after exclusion of 36 bins corresponding to filter residues and free EDTA. <sup>i</sup>Number of bins after exclusion of 28 bins corresponding to filter residues and free EDTA. <sup>j</sup>Number of bins after exclusion of 15 bins corresponding to filter residues and free EDTA.

| (a) Urinary AKI data set. |                                  |                                      |                                    |                                        |                                  |                                      |                  |                  |                  |                  |
|---------------------------|----------------------------------|--------------------------------------|------------------------------------|----------------------------------------|----------------------------------|--------------------------------------|------------------|------------------|------------------|------------------|
|                           | BF ( $\lambda = 1$ )<br>plateaus | BF ( $\lambda = 1$ )<br>non-plateaus | BF ( $\lambda = 2.5$ )<br>plateaus | BF ( $\lambda = 2.5$ )<br>non-plateaus | BF ( $\lambda = 5$ )<br>plateaus | BF ( $\lambda = 5$ )<br>non-plateaus | SRV              | JBA              | EB<br>(0.01 ppm) | EB<br>(0.02 ppm) |
| No. regions               | 180                              | 268                                  | 498                                | 383                                    | 574                              | 309                                  | 585              | 731              | 700              | 350              |
| (b) Plasma AKI data set.  |                                  |                                      |                                    |                                        |                                  |                                      |                  |                  |                  |                  |
|                           | BF ( $\lambda = 1$ )<br>plateaus | BF ( $\lambda = 1$ )<br>non-plateaus | BF ( $\lambda = 2.5$ )<br>plateaus | BF ( $\lambda = 2.5$ )<br>non-plateaus | BF ( $\lambda = 5$ )<br>plateaus | BF ( $\lambda = 5$ )<br>non-plateaus | SRV              | JBA              | EB<br>(0.01 ppm) | EB<br>(0.02 ppm) |
| No. regions               | 333 <sup>a</sup>                 | 273 <sup>b</sup>                     | 503 <sup>c</sup>                   | 249 <sup>d</sup>                       | 723 <sup>e</sup>                 | 224 <sup>f</sup>                     | 533 <sup>g</sup> | 520 <sup>h</sup> | 712 <sup>i</sup> | 355 <sup>j</sup> |

## 4 Supplementary Figures

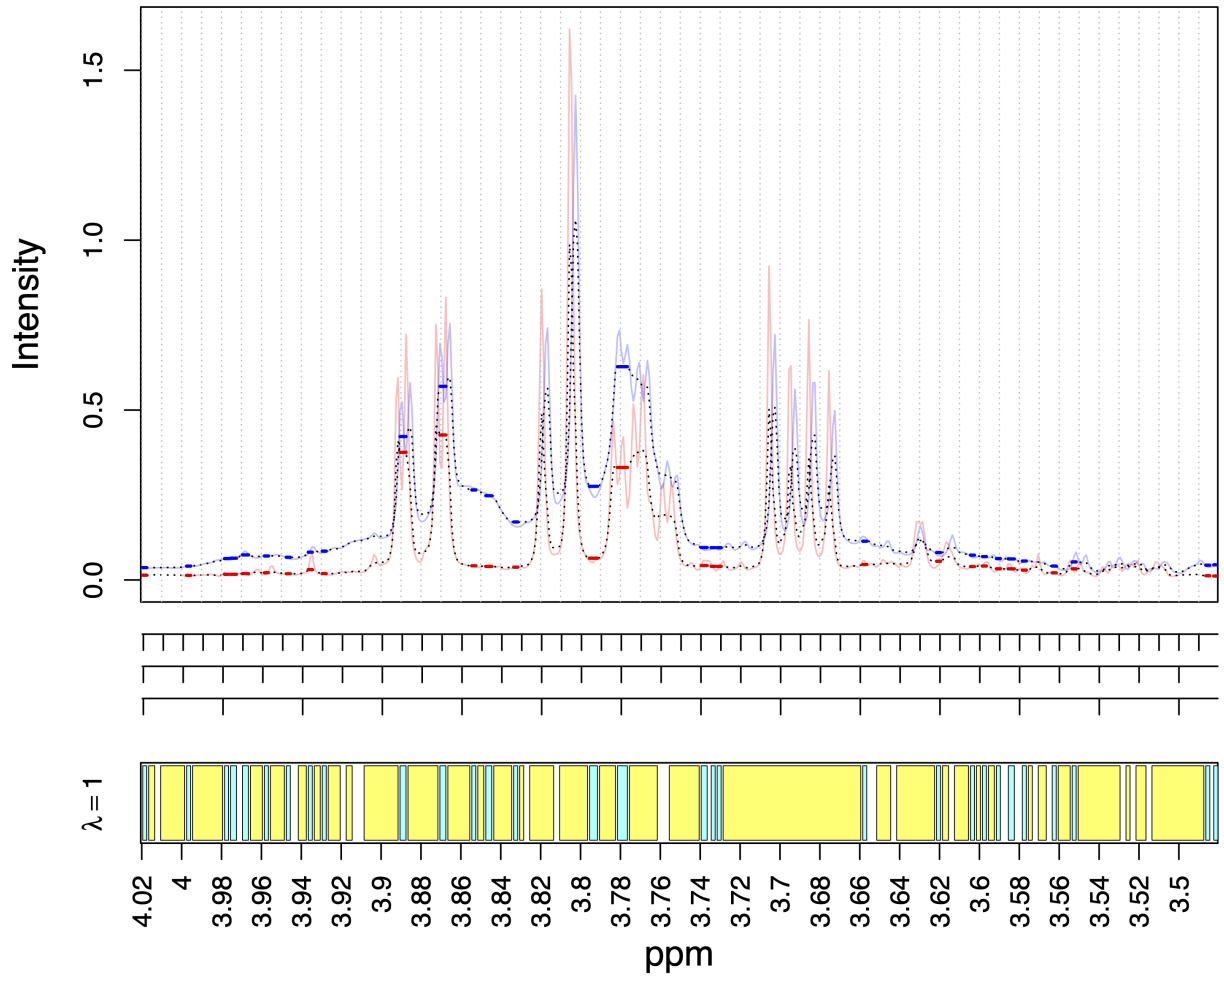

Figure S1: Exemplary NMR spectral regions ranging from 4 ppm to 3.5 ppm together with their corresponding BF fits for  $\lambda = 1$ . The Figure can be understood analogous to Figure 1a and b in the main article.

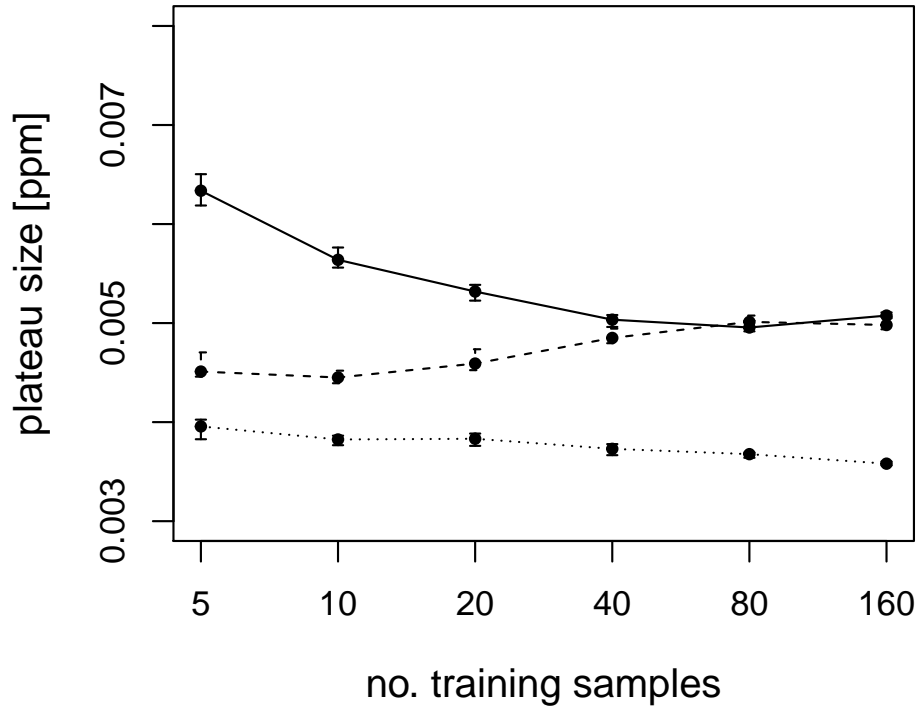

Figure S2: Average plateau widths versus the number of training samples for  $\lambda = 1$  (dotted line),  $\lambda = 2.5$  (dashed line),  $\lambda = 5$  (solid line) in the GCKD data set. The error bars indicate the 25% to 75% percentiles and the dots the corresponding median values across 50 simulation runs.

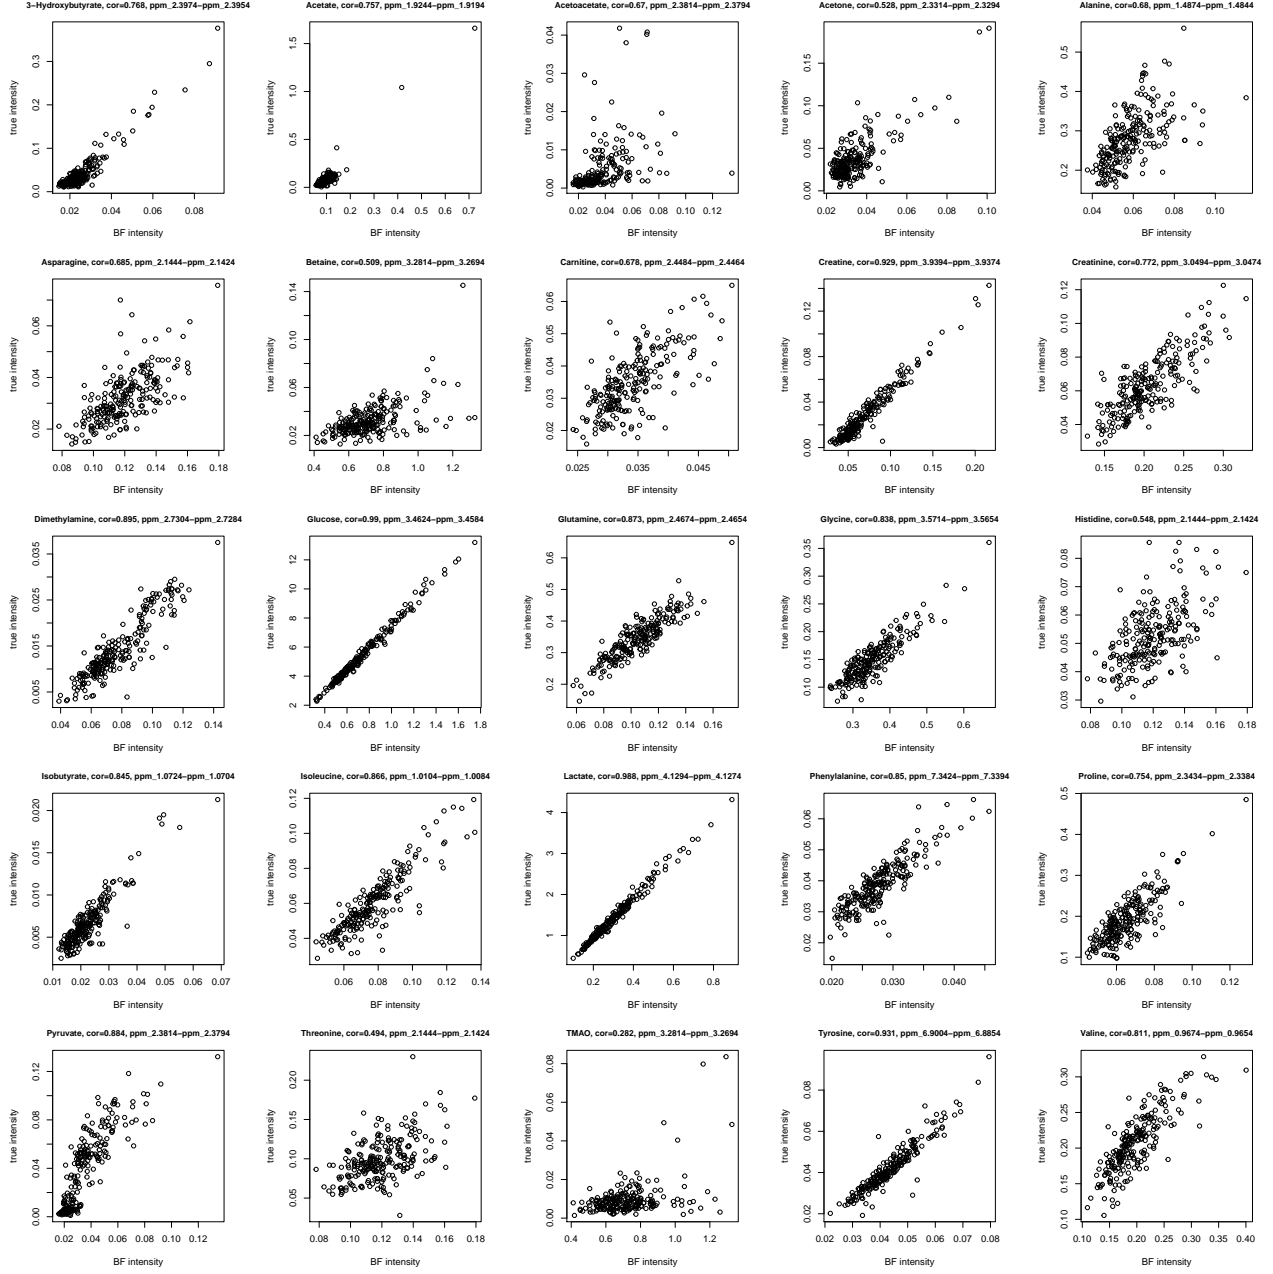

Figure S3: Comparison of the integrals of spectral features constructed by the Bucket Fuser (BF) using  $\lambda = 1$  with absolutely quantified metabolite concentrations for 25 metabolites. The  $x$ -axis gives the spectral intensities returned by the Bucket Fuser which correlate best with the absolute concentrations shown on the  $y$ -axis. The headings indicate the investigated metabolites, followed by Spearman's correlation, and the selected spectral region from the BF binning in ppm. Abbr.: TMAO, trimethylamine-N-oxide.

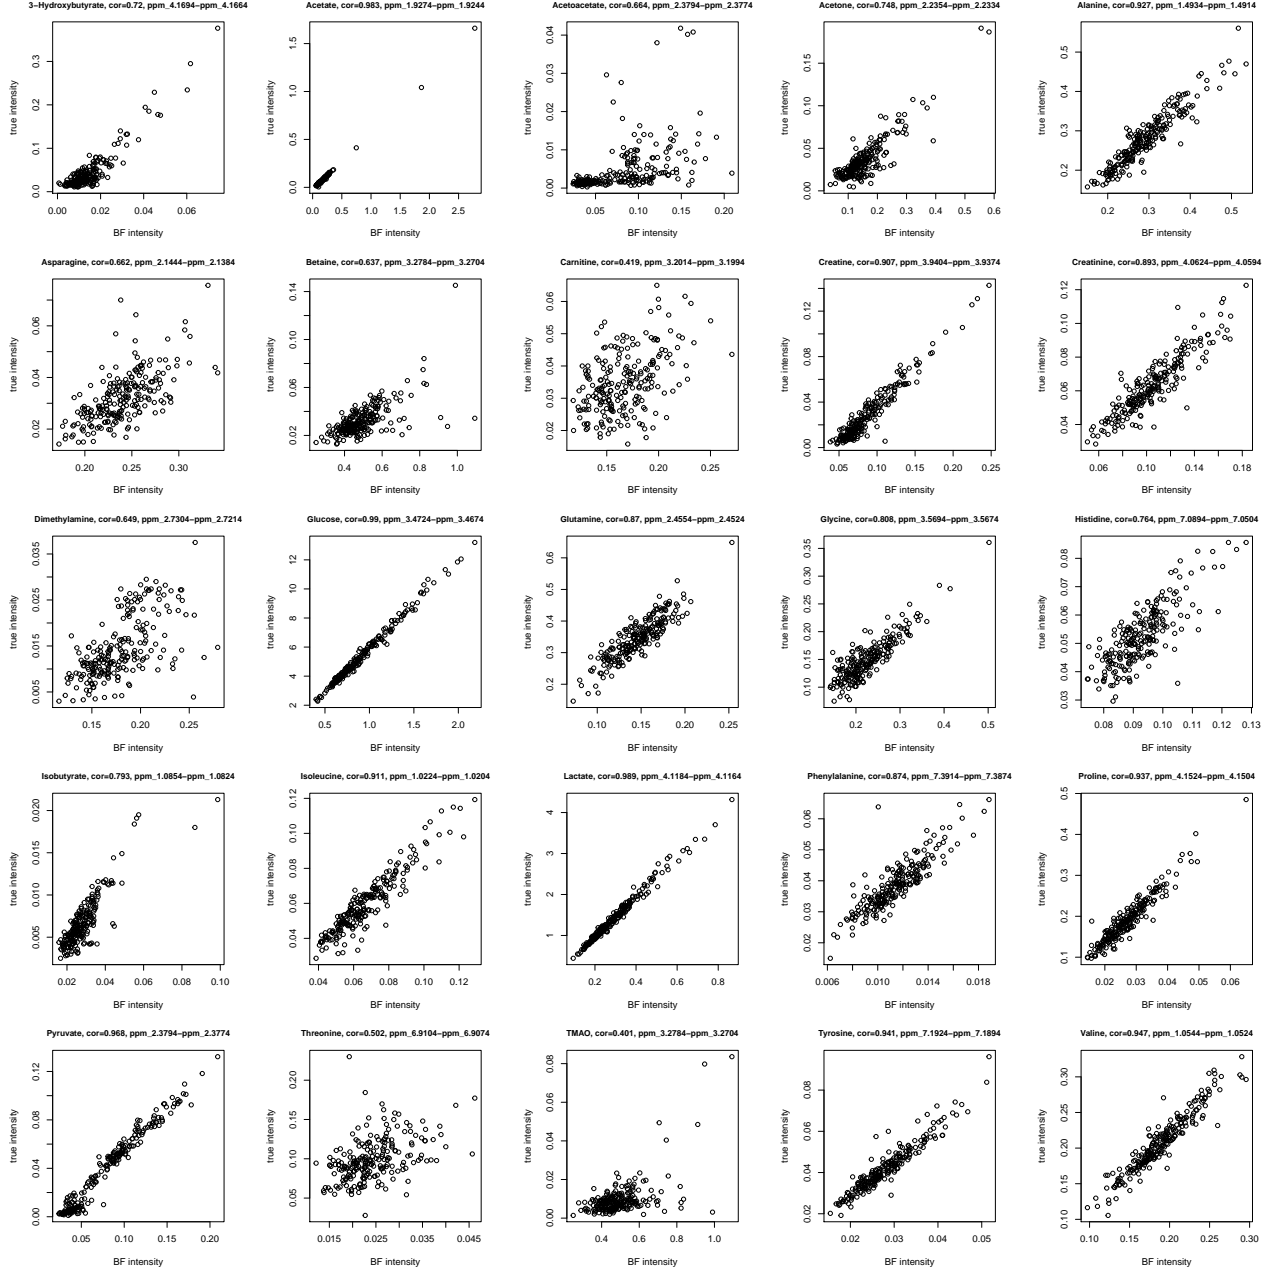

Figure S4: Comparison of the integrals of spectral features constructed by the Bucket Fuser (BF) using  $\lambda = 2.5$  with absolutely quantified metabolite concentrations for 25 metabolites. The  $x$ -axis gives the spectral intensities returned by the Bucket Fuser which correlate best with the absolute concentrations shown on the  $y$ -axis. The headings indicate the investigated metabolites, followed by Spearman's correlation, and the selected spectral region from the BF binning in ppm. Abbr.: TMAO, trimethylamine-N-oxide.

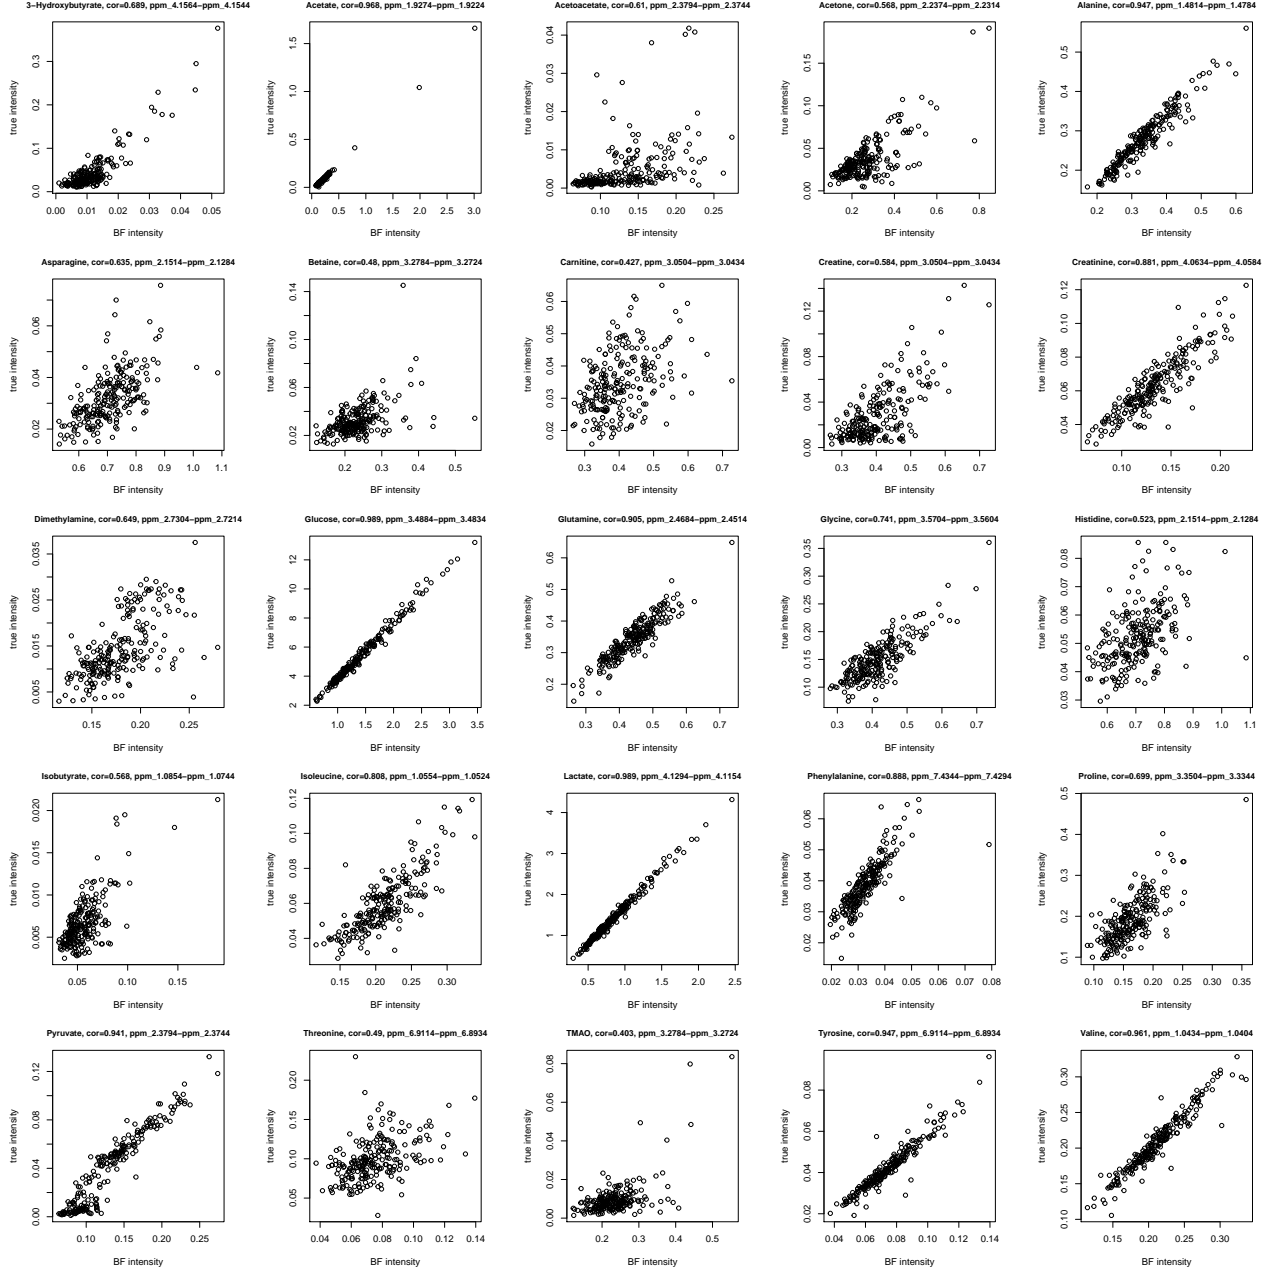

Figure S5: Comparison of the integrals of spectral features constructed by the Bucket Fuser (BF) using  $\lambda = 5$  with absolutely quantified metabolite concentrations for 25 metabolites. The  $x$ -axis gives the spectral intensities returned by the Bucket Fuser which correlate best with the absolute concentrations shown on the  $y$ -axis. The headings indicate the investigated metabolites, followed by Spearman's correlation, and the selected spectral region from the BF binning in ppm. Abbr.: TMAO, trimethylamine-N-oxide.



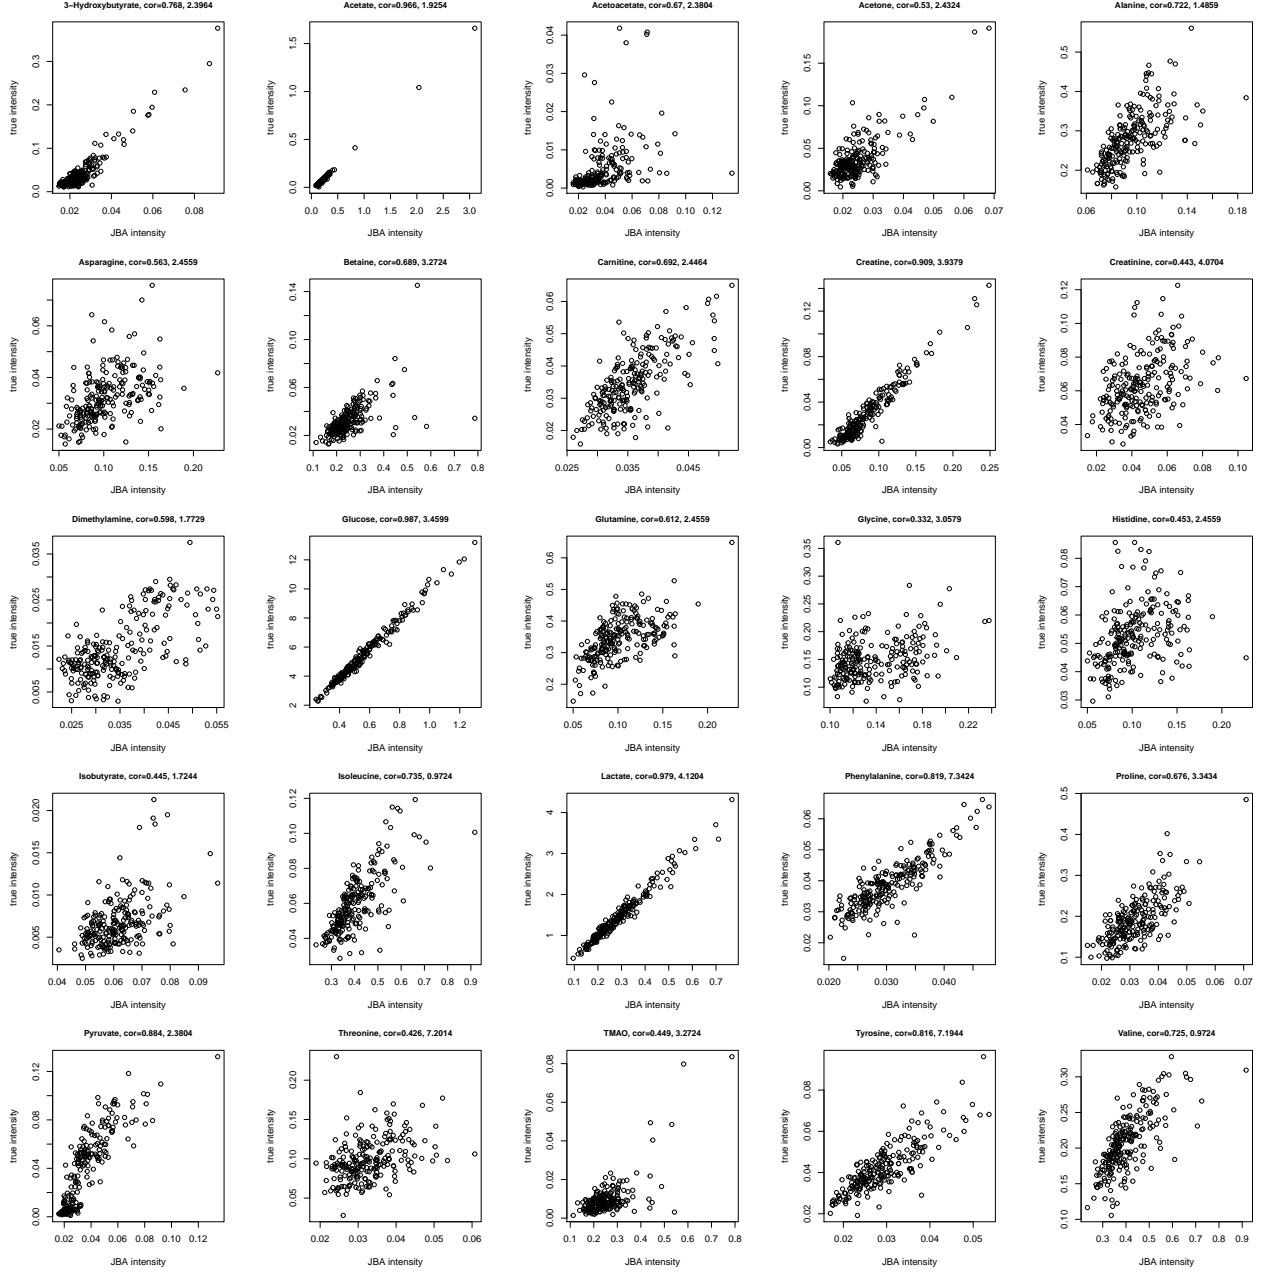

Figure S6: Comparison of the integrals of spectral features constructed by JBA with absolutely quantified metabolite concentrations for 25 metabolites. The  $x$ -axis gives the spectral intensities returned by JBA which correlate best with the absolute concentrations shown on the  $y$ -axis. The headings indicate the investigated metabolites, followed by Spearman's correlation, and the selected spectral region in ppm. Abbr.: TMAO, trimethylamine-N-oxide.

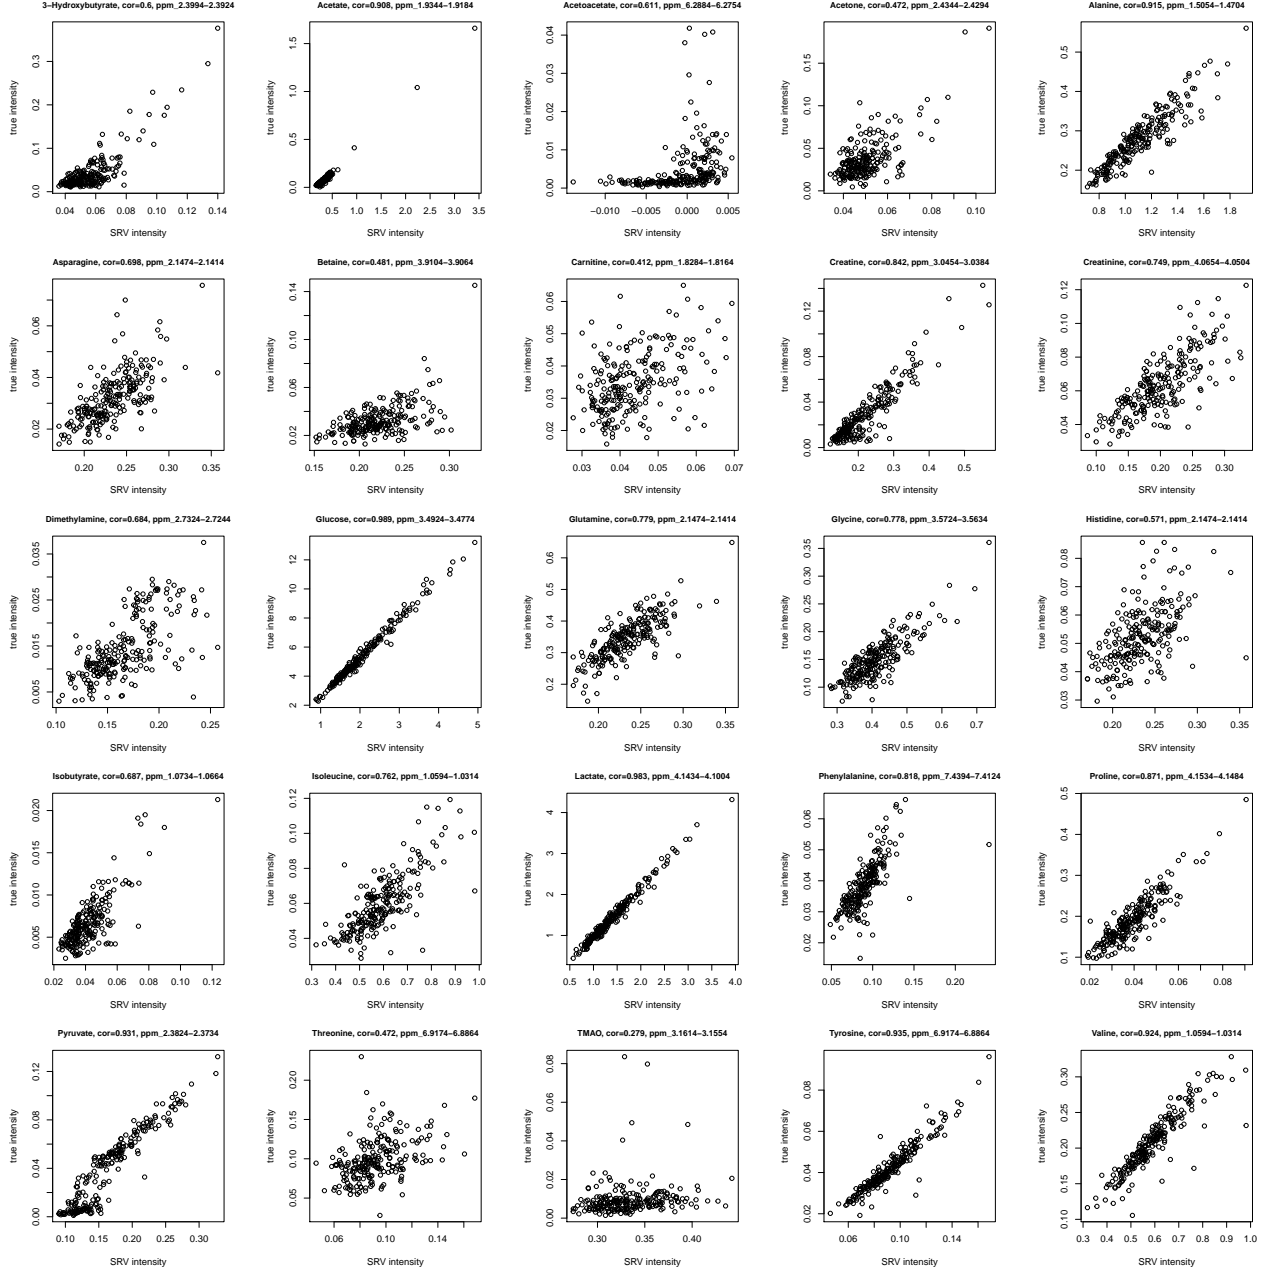

Figure S7: Comparison of the integrals of spectral features constructed by SRV with absolutely quantified metabolite concentrations for 25 metabolites. The  $x$ -axis gives the spectral intensities returned by the Bucket Fuser which correlate best with the absolute concentrations shown on the  $y$ -axis. The headings indicate the investigated metabolites, followed by Spearman's correlation, and the selected spectral region from the BF binning in ppm. Abbr.: TMAO, trimethylamine-N-oxide.

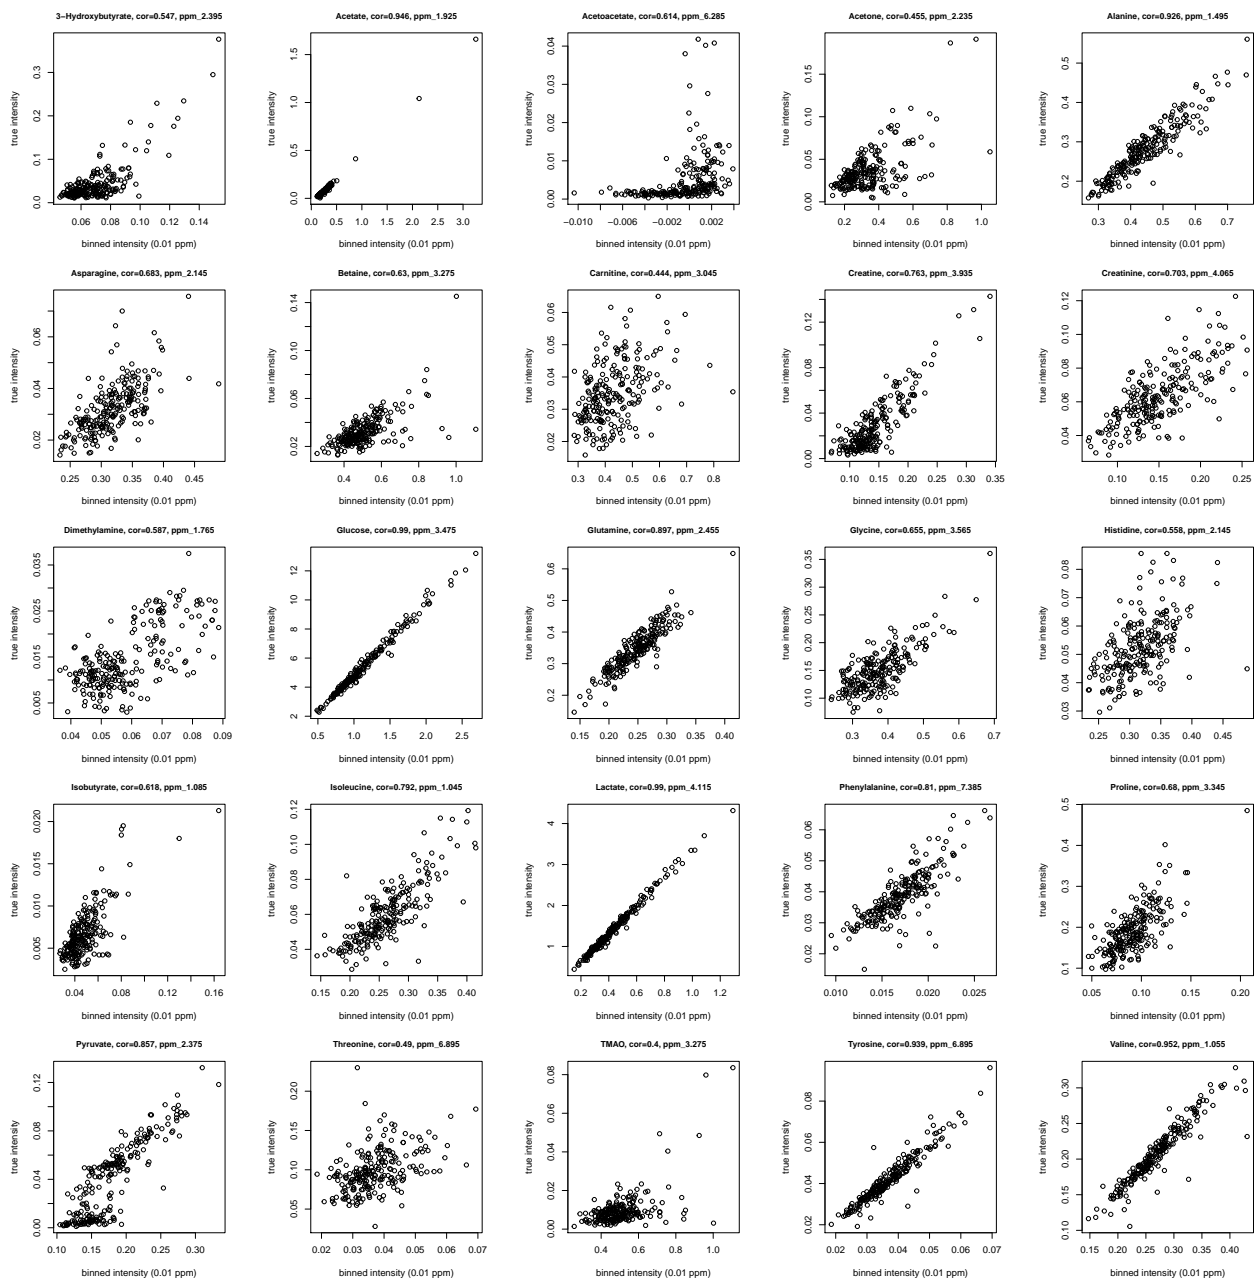

Figure S8: Comparison of the integrals of spectral features from an equidistant binning (bin size = 0.01 ppm) with absolutely quantified metabolite concentrations for 25 metabolites. The  $x$ -axis gives the spectral intensities returned by the binning which correlate best with the absolute concentrations shown on the  $y$ -axis. The headings indicate the investigated metabolites, followed by Spearman's correlation, and the selected spectral region in ppm. Abbr.: TMAO, trimethylamine-N-oxide.

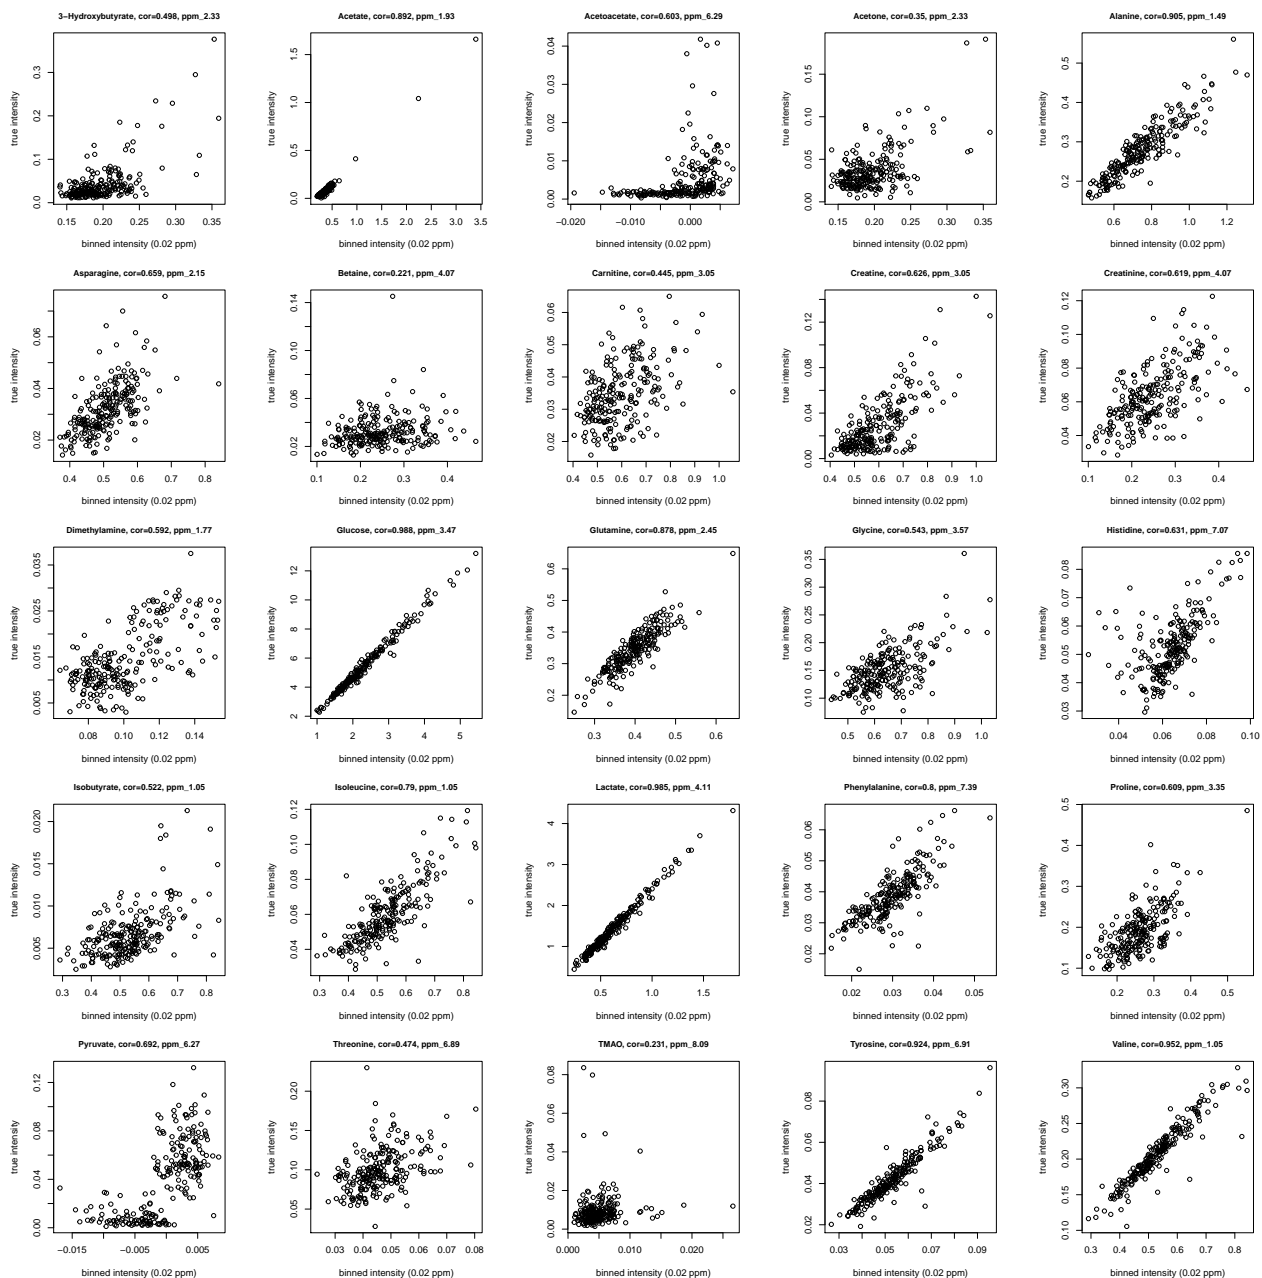

Figure S9: Comparison of the integrals of spectral features from an equidistant binning (bin size = 0.02 ppm) with absolutely quantified metabolite concentrations for 25 metabolites. The  $x$ -axis gives the spectral intensities returned by the binning which correlate best with the absolute concentrations shown on the  $y$ -axis. The headings indicate the investigated metabolites, followed by Spearman's correlation, and the selected spectral region in ppm. Abbr.: TMAO, trimethylamine-N-oxide.

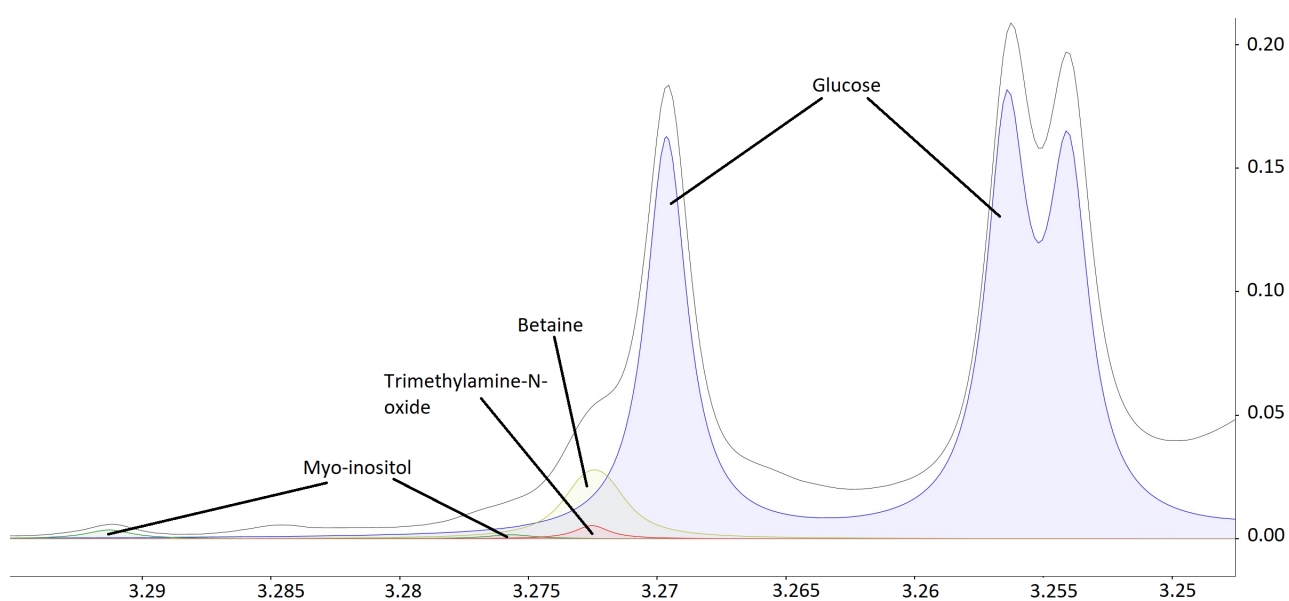

Figure S10: Exemplary NMR spectral region from 3.29 to 3.25 ppm, comprising metabolite signals of D-glucose, betaine, trimethylamine-N-oxide, and myo-inositol. One exemplary GCKD NMR spectrum is shown in black, reference spectra of the pure compounds D-glucose, betaine, trimethylamine-N-oxide, and myo-inositol manually fitted to the GCKD NMR spectrum, are shown in blue, light green, red, and dark green, respectively.

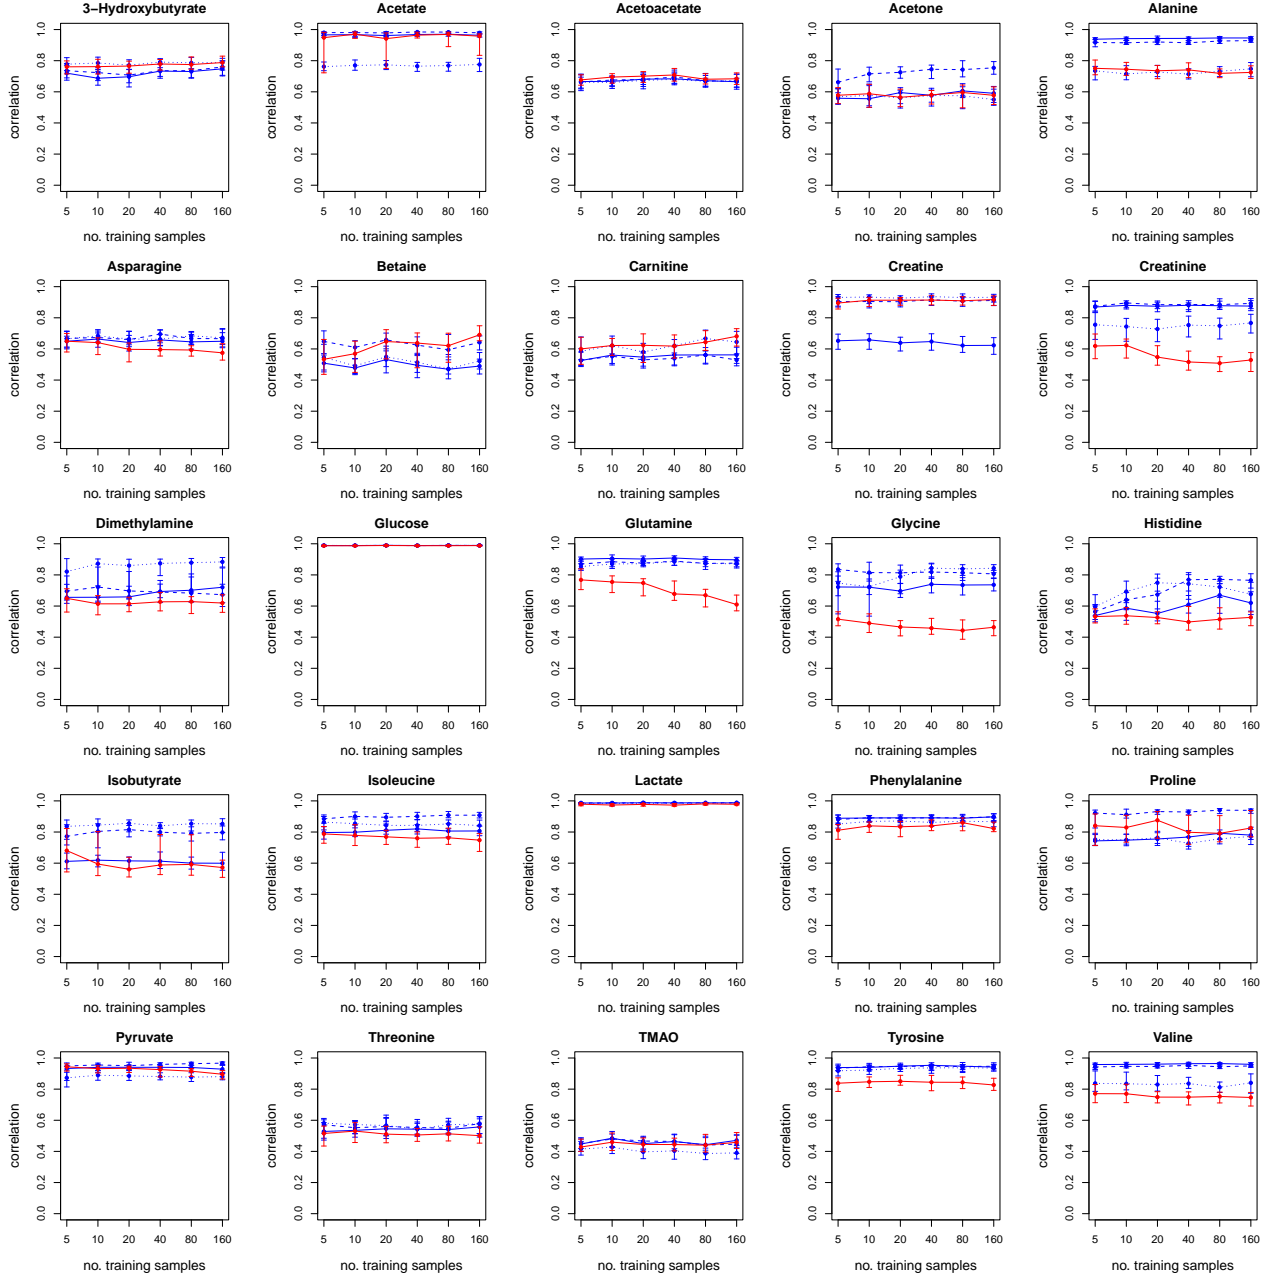

Figure S11: Spearman's correlations between absolutely quantified metabolite concentrations and integrals of corresponding spectral features from different binning approaches in dependence of the number of training samples  $n$  for 25 absolutely quantified metabolites in the GCKD data set. The points give the median Spearman's correlation obtained on test data and the whiskers the corresponding 25% and 75% quartiles. The dotted, dashed, and solid blue lines correspond to BF with  $\lambda = 1$ ,  $\lambda = 2.5$ , and  $\lambda = 5$ , respectively, the solid red line to JBA. The metabolite identity is given in the header of the plots. Abbr.: TMAO, trimethylamine-N-oxide.

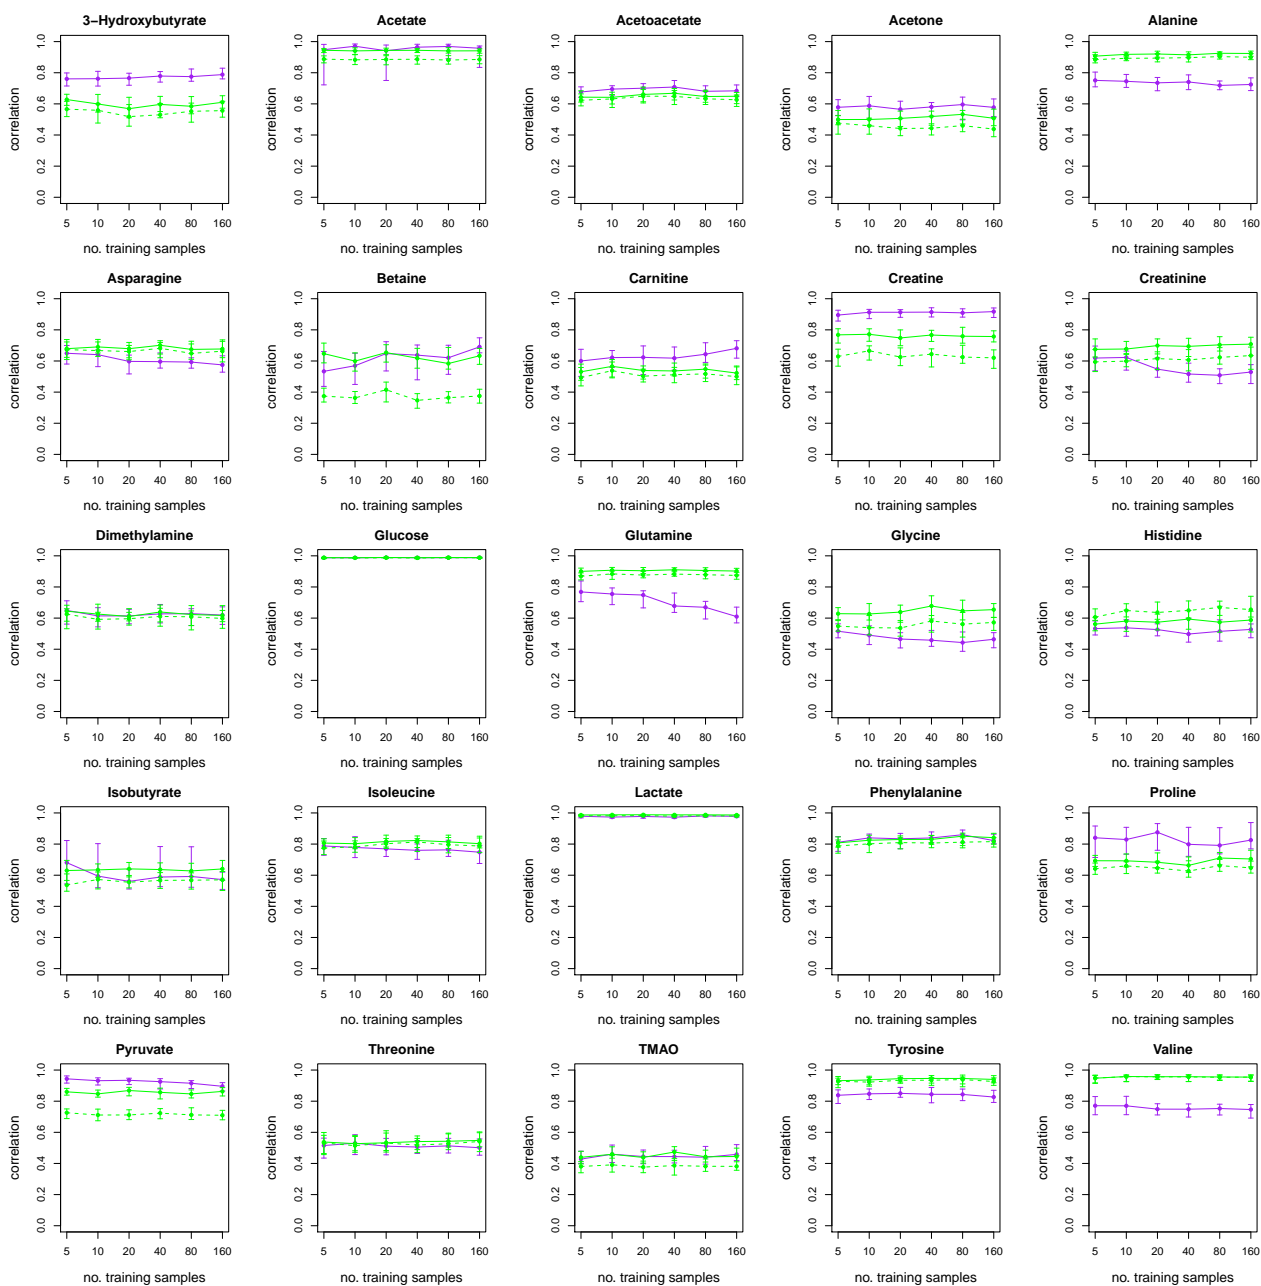

Figure S12: Spearman's correlations between absolutely quantified metabolite concentrations and integrals of corresponding spectral features from different binning approaches in dependence of the number of training samples  $n$  for 25 absolutely quantified metabolites in the GCKD data set. The points give the median Spearman's correlation obtained on test data and the whiskers the corresponding 25% and 75% quartiles. The solid purple lines correspond to SRV and the green solid and dashed lines to an equidistant binning with bin size 0.01 ppm and 0.02 ppm, respectively. The metabolite identity is given in the header of the plots. Abbr.: TMAO, trimethylamine-N-oxide.

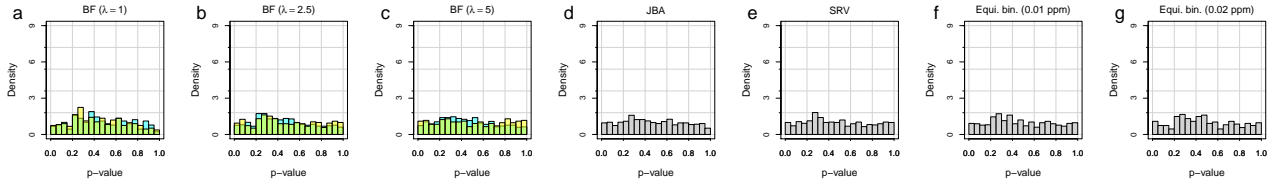

Figure S13:  $P$ -value distributions for the comparison AKI versus non-AKI after cardiac surgery based on permuted urine data. Figure (a) to (g) correspond to the different binning approaches, BF with  $\lambda = 1$ , BF with  $\lambda = 2.5$ , BF with  $\lambda = 5$ , JBA, SRV, equidistant binning with bin size 0.01 ppm, and equidistant binning with bin size 0.02 ppm, respectively. For the BF method, the same color coding as, e.g., in Figure 1 was applied. Please note that light green bars correspond to the overlap of cyan and yellow bars.

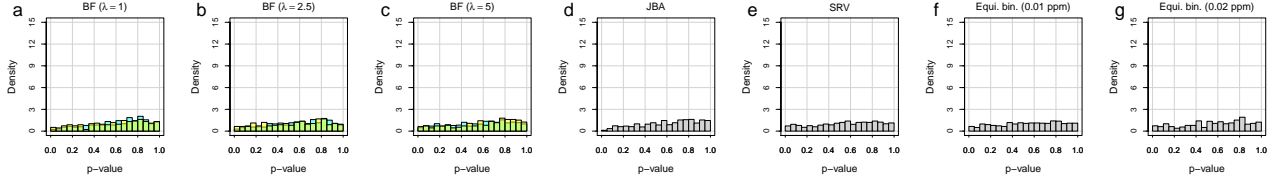

Figure S14:  $P$ -value distributions for the comparison AKI versus non-AKI after cardiac surgery based on permuted plasma data. Figure (a) to (g) correspond to the different binning approaches, BF with  $\lambda = 1$ , BF with  $\lambda = 2.5$ , BF with  $\lambda = 5$ , JBA, SRV, equidistant binning with bin size 0.01 ppm, and equidistant binning with bin size 0.02 ppm, respectively. For the BF method, the same color coding as, e.g., in Figure 1 was applied. Please note that light green bars correspond to the overlap of cyan and yellow bars.



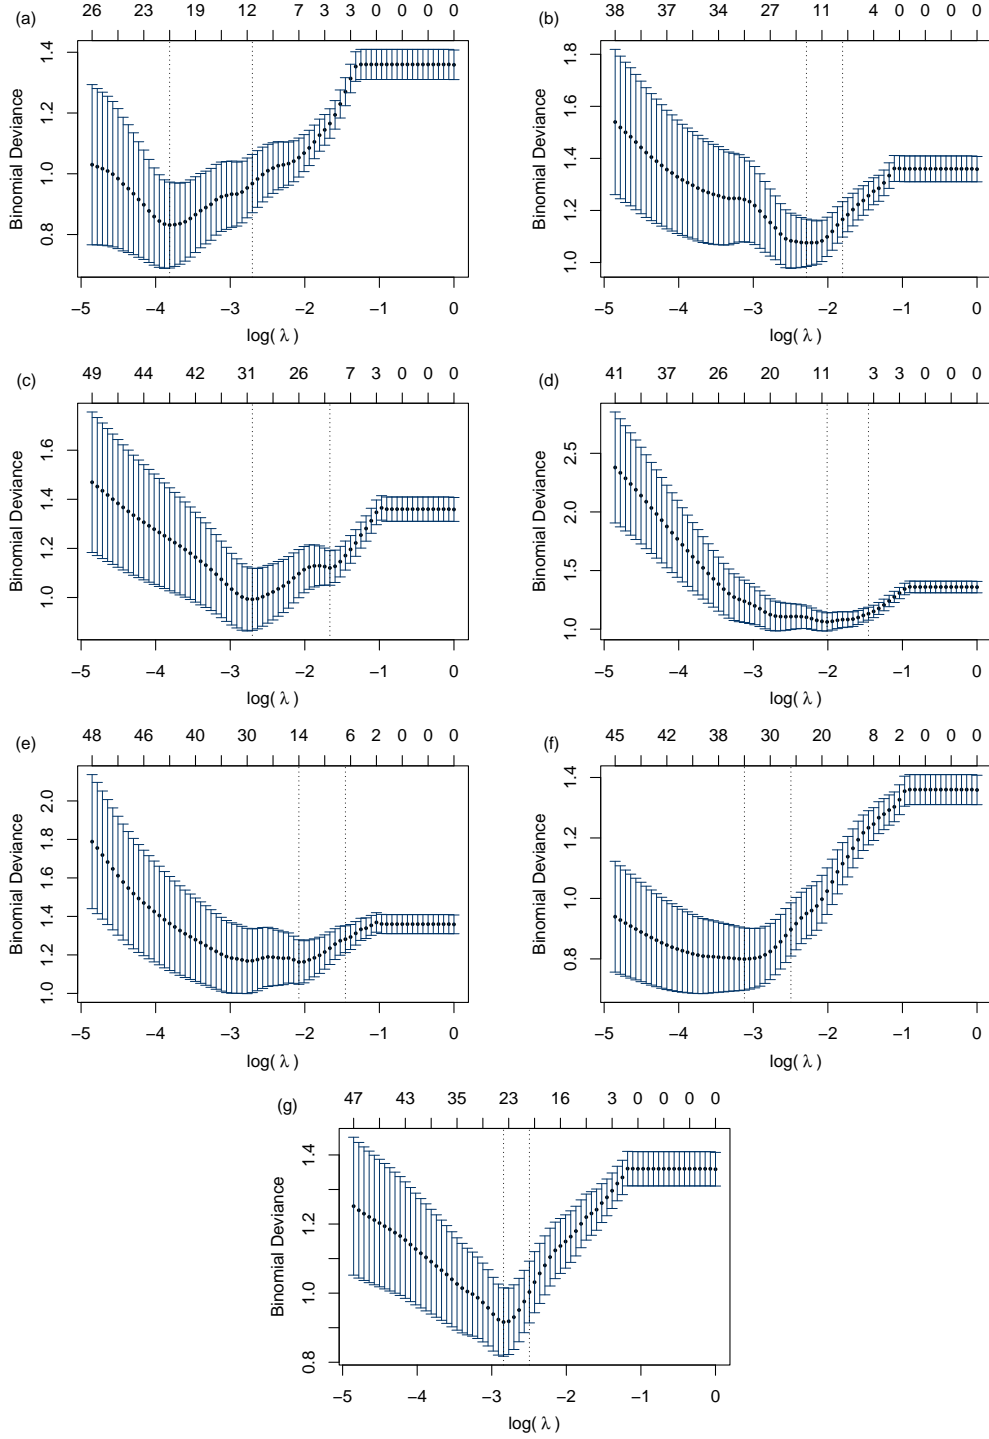

Figure S15: Hyper-parameter calibration of binomial zero-sum regression for the plasma AKI data set. Figures correspond to BF ( $\lambda = 1$ ) (a), BF ( $\lambda = 2.5$ ) (b), BF ( $\lambda = 5$ ) (c), JBA (d), SRV (e), EB (0.01 ppm) (f), and EB (0.02 ppm) (g). The  $x$ -axis gives  $\log(\lambda)$  corresponding to the size of the  $l_1$  regularization term of zero-sum regression (not to be confused with the BF regularization) and the  $y$ -axis gives the binomial deviance in a leave-one-out cross validation. The values at the top of the figures give the number of selected NMR features.

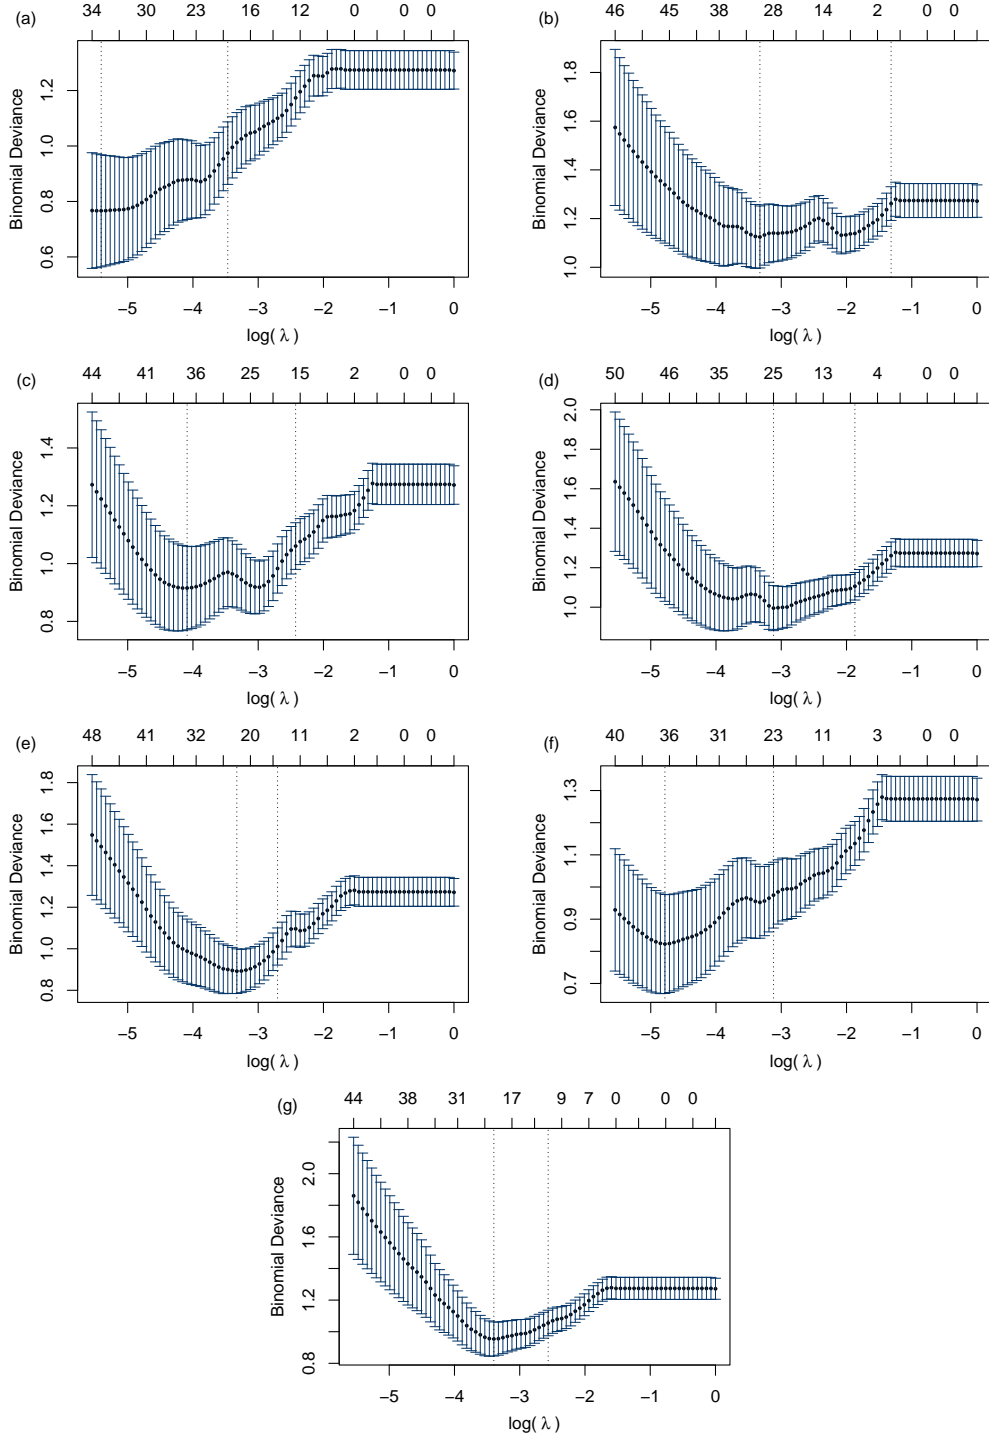

Figure S16: Hyper-parameter calibration of binomial zero-sum regression for the urinary AKI data set. Figures correspond to BF ( $\lambda = 1$ ) (a), BF ( $\lambda = 2.5$ ) (b), BF ( $\lambda = 5$ ) (c), JBA (d), SRV (e), EB (0.01 ppm) (f), and EB (0.02 ppm) (g). The  $x$ -axis gives  $\log(\lambda)$  corresponding to the size of the  $l_1$  regularization term of zero-sum regression (not to be confused with the BF regularization) and the  $y$ -axis gives the binomial deviance in a leave-one-out cross validation. The values at the top of the figures give the number of selected NMR features.

## 5 Relationship between the choice of logarithmic base and the regularization parameter $\lambda$

Data values on a logarithmic scale with base  $b$  can be translated to base  $b'$  by

$$\log_b(y_{ij}) = \frac{\log_{b'}(y_{ij})}{\log_{b'}(b)}.$$

With  $Y_{ij} = \log_b(y_{ij})$ ,  $Y'_{ij} = \log_{b'}(y_{ij})$  and  $c = \log_{b'}(b)$ , we obtain

$$Y_{ij} = \frac{1}{\log_{b'}(b)} Y'_{ij} = \frac{1}{c} Y'_{ij}.$$

Therefore, Eq. (1) from the main manuscript becomes

$$\begin{aligned} \hat{B} &= \arg \min_B \left\{ \|Y - B\|_F^2 + \lambda \sqrt{n} \sum_{j=1}^{p-1} \|B_{\cdot j} - B_{\cdot j+1}\|_2 \right\} \\ &= \arg \min_B \left\{ \left\| \frac{1}{c} Y' - B \right\|_F^2 + \lambda \sqrt{n} \sum_{j=1}^{p-1} \|B_{\cdot j} - B_{\cdot j+1}\|_2 \right\} \\ &= \arg \min_B \left\{ \|Y' - cB\|_F^2 + c^2 \lambda \sqrt{n} \sum_{j=1}^{p-1} \|B_{\cdot j} - B_{\cdot j+1}\|_2 \right\} \\ &= \arg \min_B \left\{ \|Y' - cB\|_F^2 + c \lambda \sqrt{n} \sum_{j=1}^{p-1} \|cB_{\cdot j} - cB_{\cdot j+1}\|_2 \right\} \end{aligned} \tag{S1}$$

Thus, an estimate of  $B'$  which corresponds to the input data  $Y'$  can be obtained via

$$\hat{B}' = \arg \min_B \left\{ \|Y' - B'\|_F^2 + \lambda' \sqrt{n} \sum_{j=1}^{p-1} \|B'_{\cdot j} - B'_{\cdot j+1}\|_2 \right\} \tag{S2}$$

with  $\lambda' = c\lambda = \log_{b'}(b)\lambda$ . As outlined in the main manuscript, regularization values of  $\lambda = \{1, 2.5, 5\}$  performed well given the specific input data (of given resolution and quality) and that the data were  $\log_2$  transformed. If data are provided using a different logarithmic base, a re-adjustment of regularization parameters might be necessary. In our case this suggests  $\lambda' = \log_{10}(2)\{1, 2.5, 5\} = \{0.301, 0.753, 1.505\}$  for  $\log_{10}$ -transformed data.

## 6 Convergence analyses of the BF algorithm

We confirmed the convergence of the BF algorithm for different step sizes  $\rho$  (Suppl. Fig. S17) and evaluated respective residuals between model fits (Suppl. Fig. S18) on the GCKD plasma data set. Details are summarized in the figure captions.

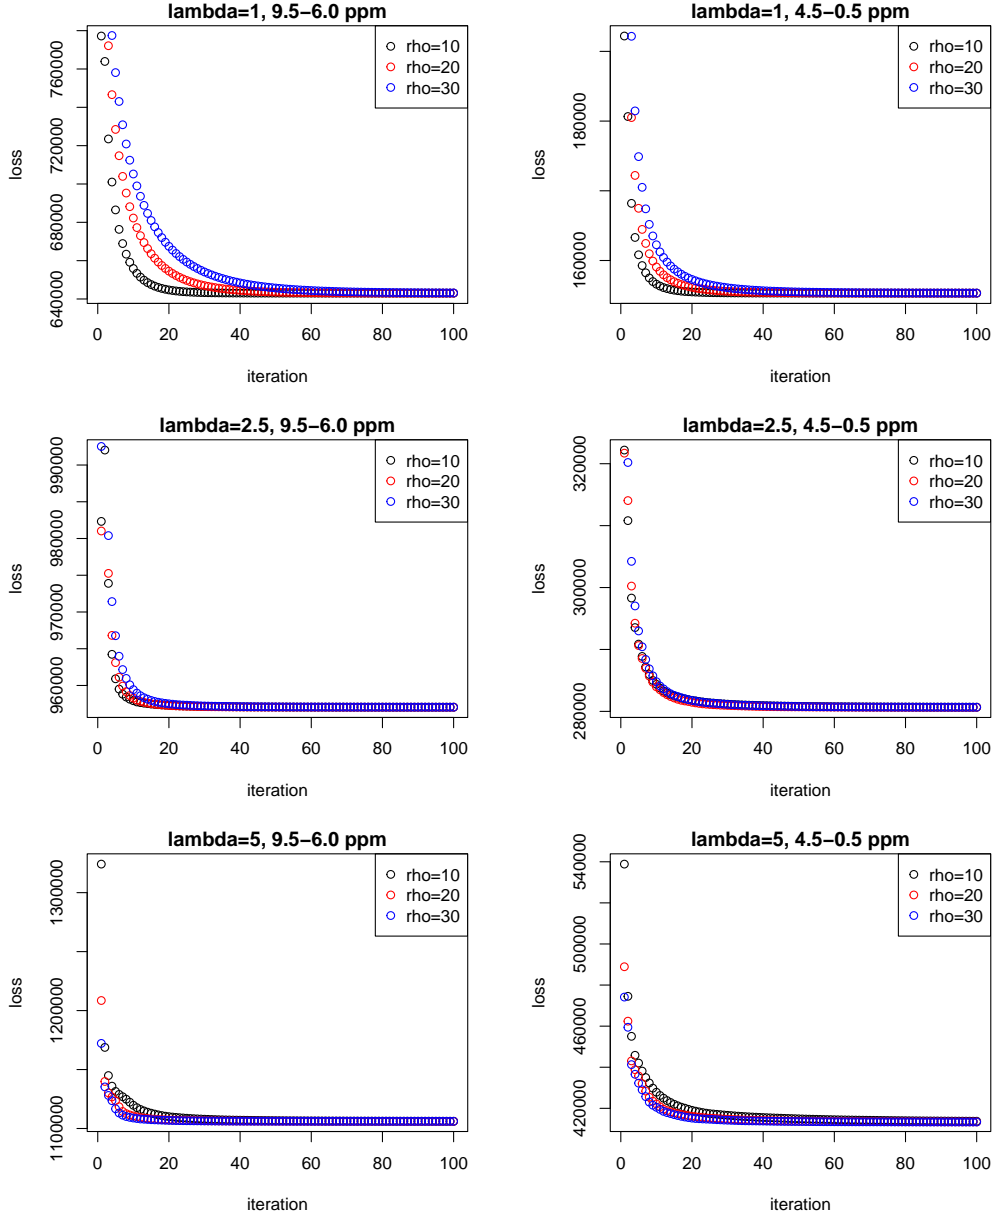

Figure S17: Losses ( $y$ -axis) versus iteration steps ( $x$ -axis). The left column corresponds to the Bucket Fuser optimization using data in the spectral region from 9.5 to 6.0 ppm and the right column to the region from 4.5 to 0.5 ppm. The rows correspond to different regularization parameters  $\lambda$ ;  $\lambda = 1$  (first row),  $\lambda = 2.5$  (second row),  $\lambda = 5$  (third row). The colors correspond to different step sizes  $\rho$ ;  $\rho = 10$  (black circles),  $\rho = 20$  (red circles), and  $\rho = 30$  (blue circles).

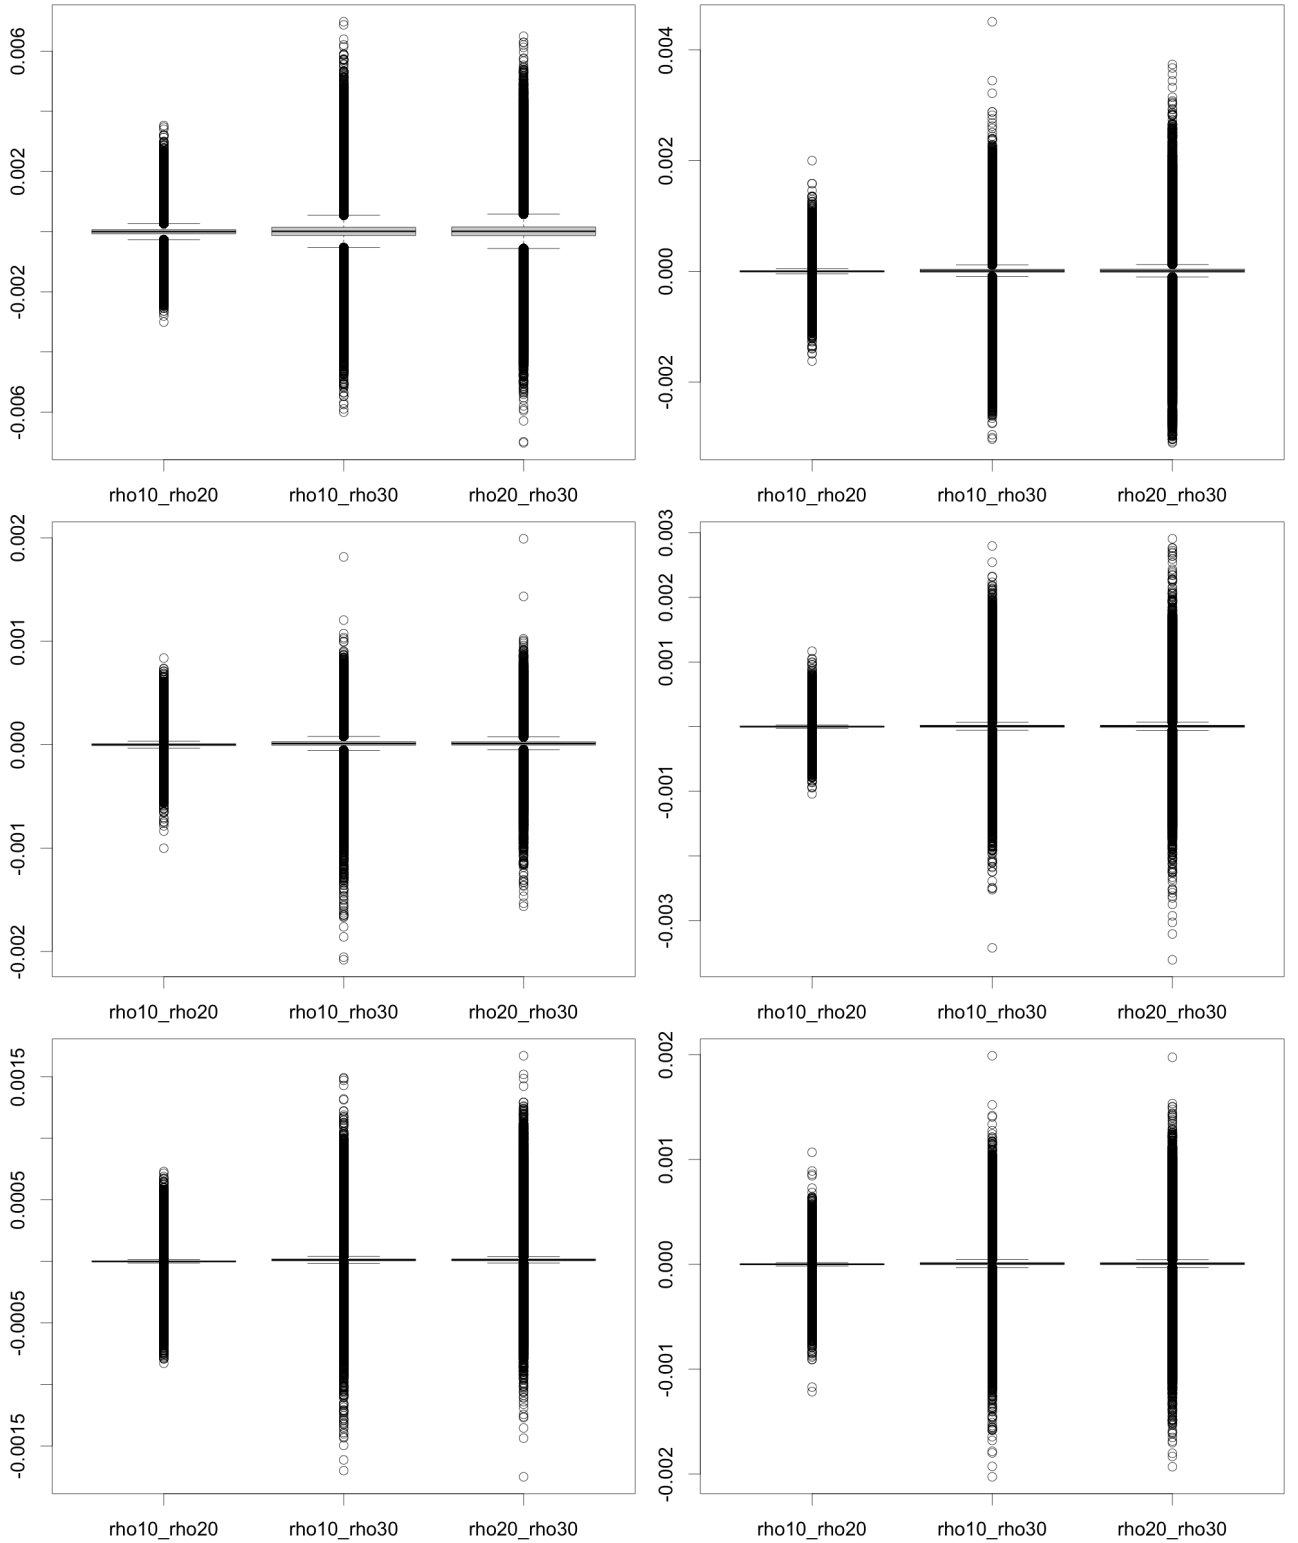

Supplement: s1 [file s1]
